# Supplementary material for: Increased soluble amyloid-beta causes early aberrant brain network hypersynchronisation in a mature-onset mouse model of amyloidosis
Source: Springer Nature journal article supplement (doi:10.1186/s40478-019-0810-7), 2019-11-14
Supplement: MOESM2 [file 25666940]

A. Hippocampus

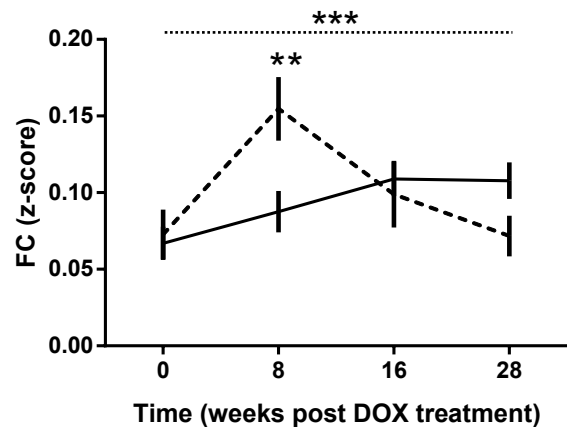

B. Cingulate (anterior part)

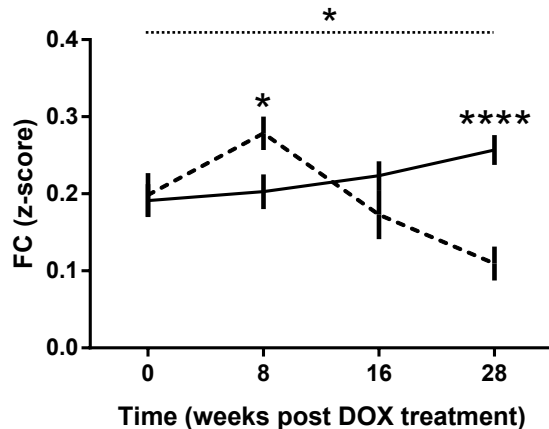

C. Cingulate (posterior part) + Retrosplenial cortex (anterior part)

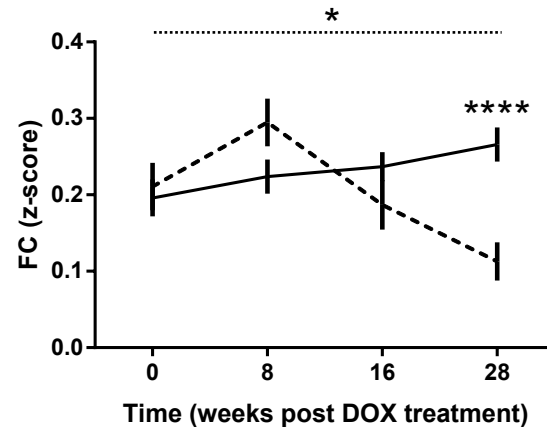

D. Retrosplenial cortex (posterior part)

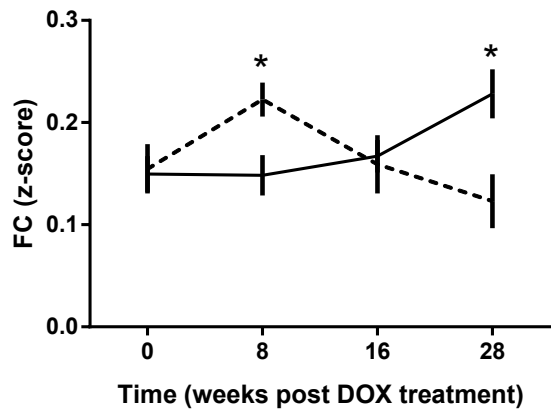

E. Parietal association cortex

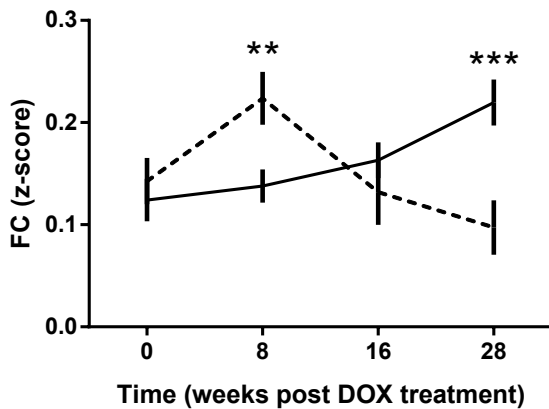

F. Frontal cortex

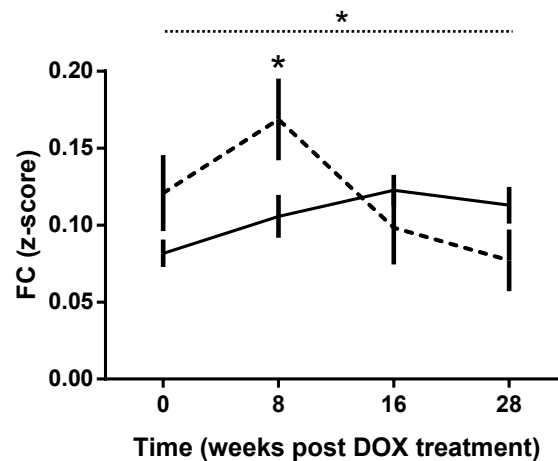

— Ctrl  
 - - - TG  
 ..... Time effect
