# Supplementary material for: Increased soluble amyloid-beta causes early aberrant brain network hypersynchronisation in a mature-onset mouse model of amyloidosis
Source: Springer Nature journal article supplement (doi:10.1186/s40478-019-0810-7), 2019-11-14

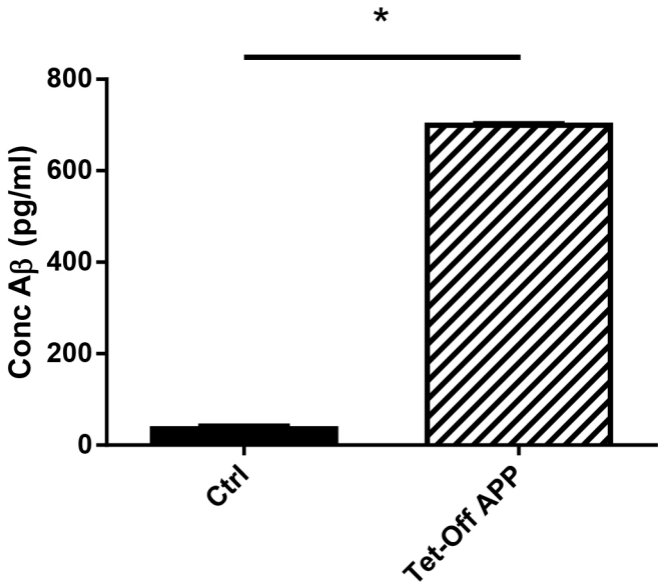

Supplement: MOESM3 [file 25666940]
